# Supplementary material for: The influences of Al species and Ti species on the catalytic epoxidation over Si/Ti-pillared MCM-36 synthesized from MCM-22
Source: Royal Society of Chemistry journal article supplement (doi:10.1039/c5cy00145e), 2015-01-01
Supplement: c5cy00145e1.pdf [file c5cy00145e1.pdf]

# The Influences of Al Species and Ti Species on the Catalytic Epoxidation over Si/Ti-pillared MCM-36 synthesized from MCM-22

*Fang Jin,<sup>1,2</sup> Shingjong Huang<sup>3</sup>, Soofin Cheng<sup>1\*</sup>, Yuanxin Wu<sup>2</sup>, Chih-Cheng Chang<sup>1</sup> and Yu-Wei Huang<sup>1</sup>*

<sup>1</sup>Key Laboratory for Green Chemical Process of Ministry of Education, School of Chemical Engineering and Pharmacy, Wuhan Institute of Technology, Wuhan 430074, China

<sup>2</sup>Department of Chemistry, National Taiwan University, Taipei 10617, Taiwan

<sup>3</sup>Instrumentation Center, National Taiwan University, Taipei 10617, Taiwan.

**Supporting information**

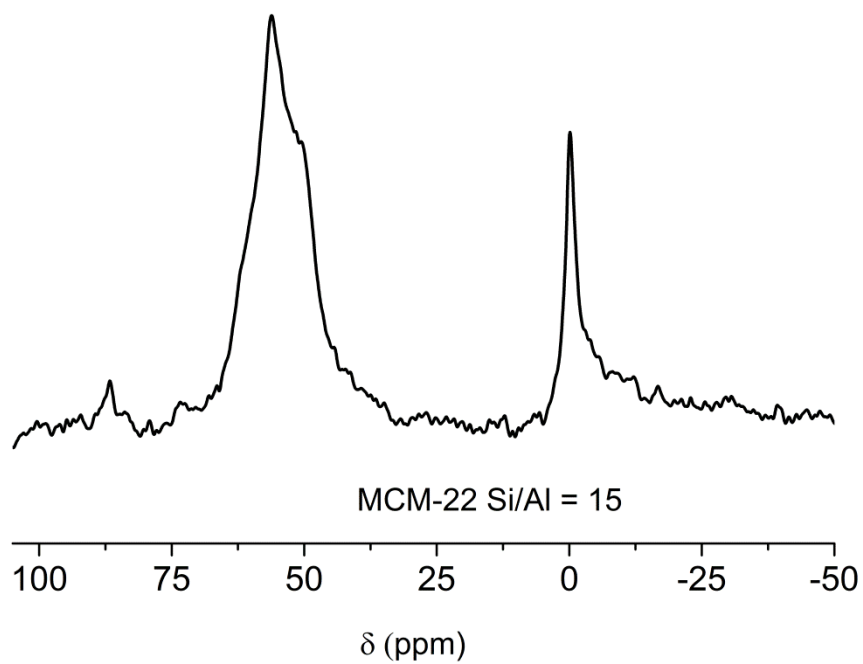

Figure S1.  $^{29}\text{Si}$  MAS NMR spectroscopy of MCM-22 with Si/Al ratio of 15.

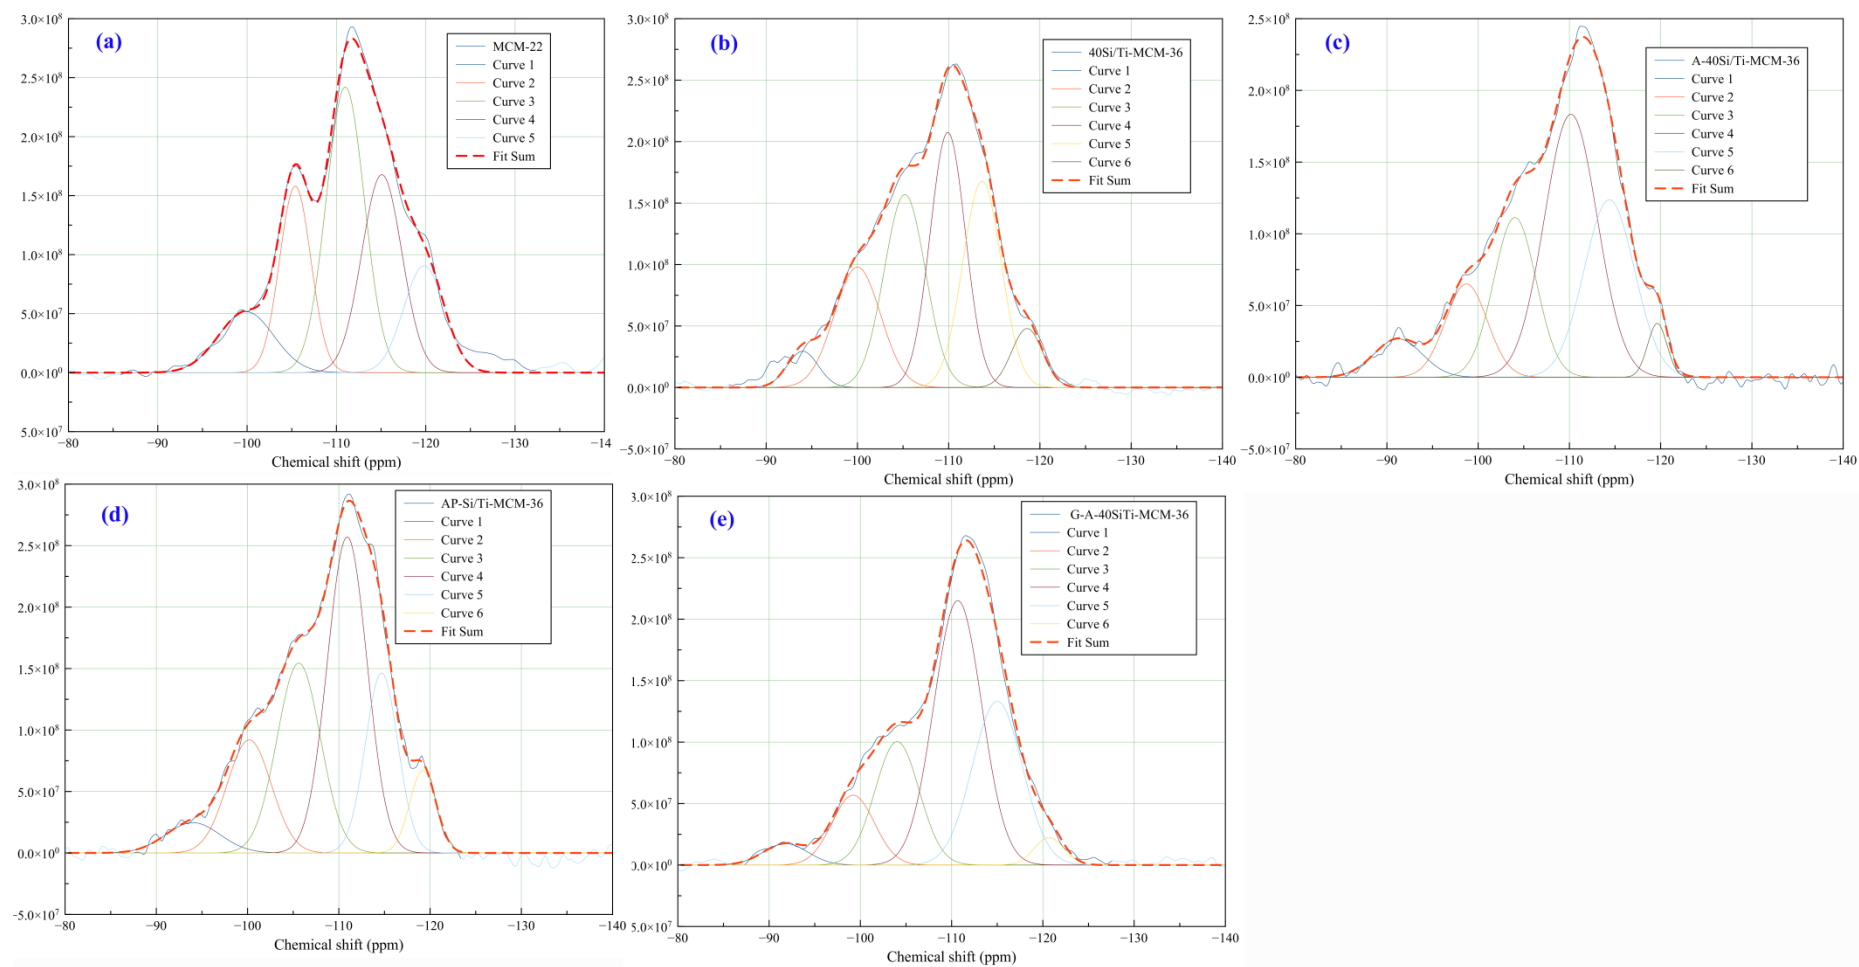

Figure S2. Fitting results of  $^{29}\text{Si}$  MAS NMR spectra of (a) MCM-22, (b) 40Si/Ti-MCM-36, (c) A-40Si/Ti-MCM-36(1 h), (d) AP-Si/Ti-MCM-36(6 h), and (e) G-A-Si/Ti-MCM-36(1 h).
